# Supplementary material for: The combination effect of homoharringtonine and ibrutinib on FLT3-ITD mutant acute myeloid leukemia
Source: PubMed Central journal article supplement (PMC5355052; doi:10.18632/oncotarget.14463), 2017-01-03
Supplement: oncotarget-08-12764-s001.pdf [file oncotarget-08-12764-s001.pdf]

## The combination effect of homoharringtonine and ibrutinib on FLT3-ITD mutant acute myeloid leukemia

### Supplementary Materials

**Supplementary Table 1: The ic50 of HHT and ibrutinib in AML cell lines at 24 h**

|                   | THP-1 | HL-60 | Kasumi-1 | MV4-11 | MOLM-13 |
|-------------------|-------|-------|----------|--------|---------|
| HHT nM            | 139.8 | 18.88 | 34.02    | 15.83  | 17.02   |
| Ibrutinib $\mu$ M | > 100 | 41.94 | 17.67    | 3.40   | 3.62    |

**Supplementary Table 2: The characteristics of the patient samples**

|       | Diagnose           | Gender | Age (year) | FAB type | Cytogenetics      | Molecular           |
|-------|--------------------|--------|------------|----------|-------------------|---------------------|
| AML#1 | <i>de novo</i>     | male   | 44         | M5       | 46,XY             | FLT3-ITD            |
| AML#2 | Relapse/refractory | male   | 68         | M2a      | complex karyotype | FLT3-ITD,CEBPA-N    |
| AML#3 | <i>de novo</i>     | female | 27         | M1       | 46, XX            | FLT3-ITD,NPM1,CEBPA |
| AML#4 | <i>de novo</i>     | male   | 47         | M2       | 46, XY            | –                   |
| AML#5 | Relapse/refractory | female | 45         | M5b      | 46, XX            | –                   |

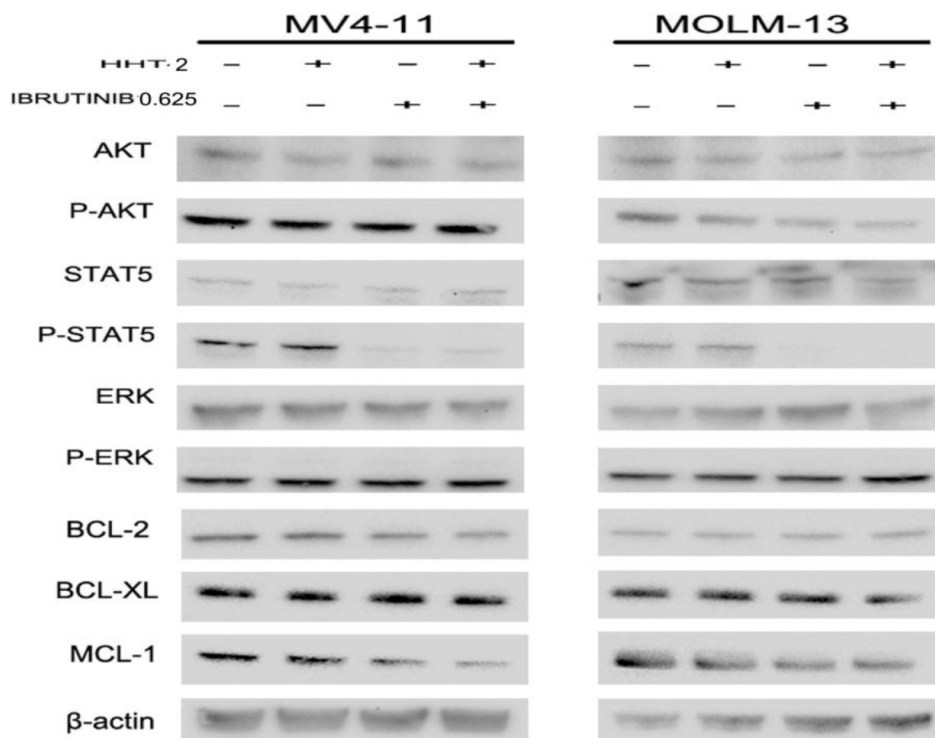

**Supplementary Figure 1: The combination of 2 nM HHT and 0.625  $\mu$ M ibrutinib down-regulated p-STAT5 and MCL-1.**

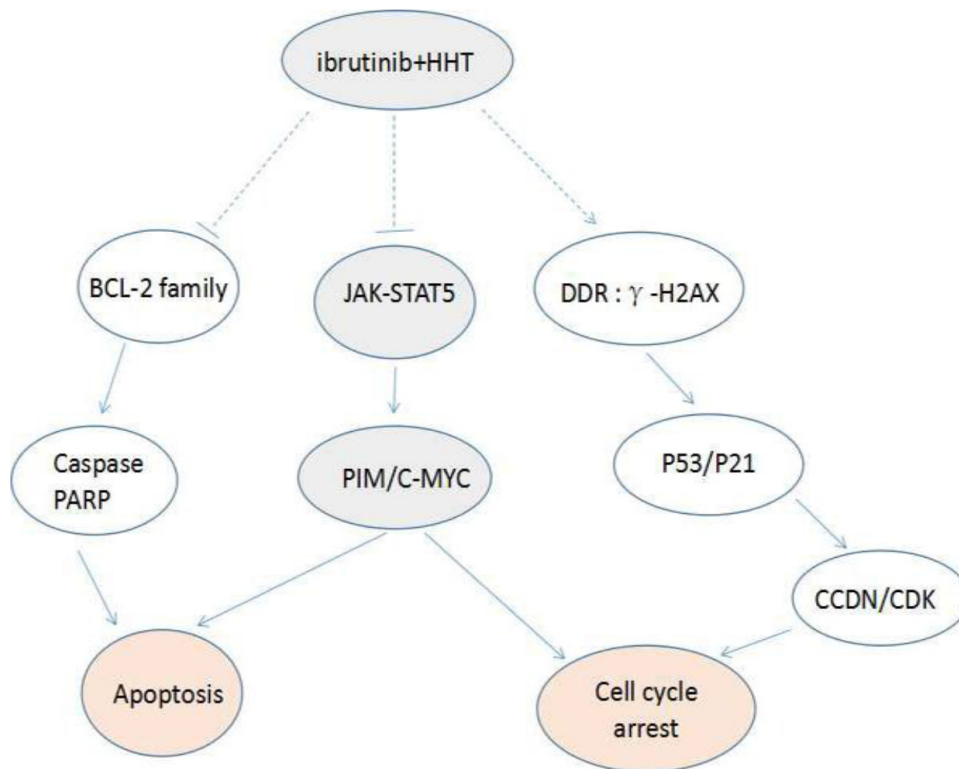

Supplementary Figure 2: The summarizing figure of the major findings and mechanisms.
